# Supplementary material for: Pd(ii) coordinated deprotonated diphenyl phosphino amino pyridine: reactivity towards solvent, base, and acid
Source: Royal Society of Chemistry journal article supplement (doi:10.1039/c4dt01665c), 2014-01-01
Supplement: c4dt01665c1.pdf [file c4dt01665c1.pdf]

**Pd(II) Coordinated deprotonated diphenyl phosphino amino pyridine:  
Reactivity towards Solvent, Base, and Acid**

Sanjay Pratihar,<sup>†,\*</sup> Rupa Pegu,<sup>†</sup> Ankur Kanti Guha,<sup>£</sup> and Bipul Sarma<sup>†</sup>

[spratihar@tezu.ernet.in](mailto:spratihar@tezu.ernet.in), [spratihar29@gmail.com](mailto:spratihar29@gmail.com)

<sup>†</sup>*Department of Chemical Sciences, Tezpur University, Napaam, 784028, Assam, India*

<sup>£</sup> *Department of Chemistry, Dibrugarh University, Dibrugarh, Assam, India*

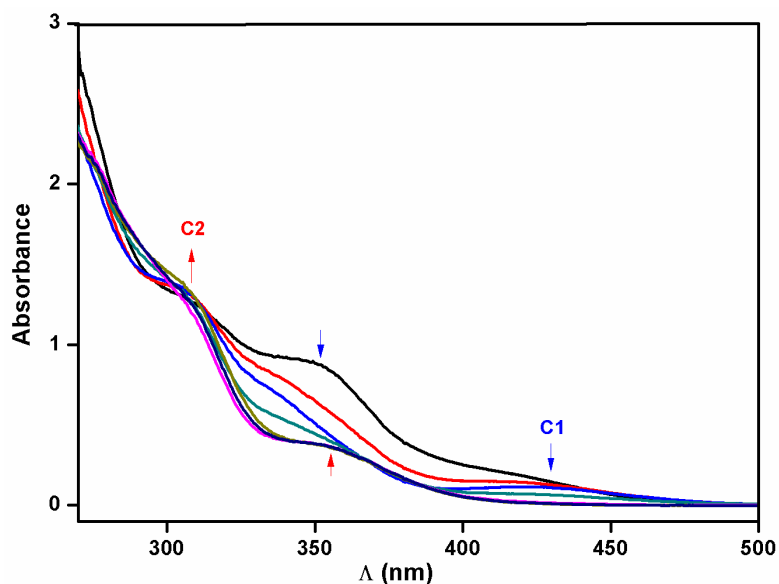

**Fig. S1** UV-vis titration of complex C1 with dilute HCl solution.

### **S1.1 Experimental and calculated transition of complex C1 and C2:**

The calculated UV-Vis spectra of **C1** resemble well with the experimentally observed transitions. The experimental transition at 418 nm (calculated = 415 nm) is found to be a  $\pi$  to  $\sigma^*$  transition originating from ligand based  $\pi$  occupied molecular orbital to  $M-L_{\sigma^*}$  orbital. Similarly, the transition at 352 nm (calculated = 342 nm), 310 nm (calculated = 317 nm) and 262 nm (calculated = 281 nm) are assigned to ligand based  $\pi$  to  $\pi^*$  transition, ligand based  $\pi$  to  $M-L_{\sigma^*}$  and metal  $d_{z^2}$  orbital to  $M-L_{\sigma^*}$  transition respectively. The experimental bands at 361 nm (calculated = 373 nm) for **C2** is assigned to be ligand based  $\pi$  molecular orbital to  $M-L_{\sigma^*}$  transition. The band at 306 nm (calculated = 306 nm) is due to be transition from metal  $d_{z^2}$  orbital to  $M-L_{\sigma^*}$  orbital. The other two calculated bands at 382 nm and 283 nm is due to the transition from ligand based  $\pi$  molecular orbital to  $M-L_{\sigma^*}$  orbital and metal  $d_{xz}$  orbital to  $M-L_{\sigma^*}$  orbital (Table S1).

**Table S1.** Key transitions in the TD-DFT computations for **C1** and **C2**.

| #         | Wavelength (nm) calc.<br>(exp.) | Key Transition (Type)                          | Osc. Strength<br>(f) |
|-----------|---------------------------------|------------------------------------------------|----------------------|
| <b>C1</b> | 415 (418)                       | HOMO→LUMO ( $L\pi \rightarrow M-L\sigma^*$ )   | 0.0382               |
|           | 398                             | HOMO-1→LUMO ( $L\pi \rightarrow M-L\sigma^*$ ) | 0.0195               |
|           | 342 (352)                       | HOMO→LUMO+1 ( $L\pi \rightarrow L\pi^*$ )      | 0.0792               |
|           | 331                             | HOMO-1→LUMO+1 ( $L\pi \rightarrow L\pi^*$ )    | 0.030                |
|           | 317 (310)                       | HOMO-2→LUMO ( $L\pi \rightarrow M-L\sigma^*$ ) | 0.0651               |
|           | 281 (262)                       | HOMO-4→LUMO ( $dz2 \rightarrow M-L\sigma^*$ )  | 0.1061               |
| <b>C2</b> | 382                             | HOMO→LUMO ( $L\pi \rightarrow M-L\sigma^*$ )   | 0.0356               |
|           | 373 (361)                       | HOMO-1→LUMO ( $L\pi \rightarrow M-L\sigma^*$ ) | 0.0101               |
|           | 331                             | HOMO-4→LUMO ( $L\pi \rightarrow M-L\sigma^*$ ) | 0.0149               |
|           | 306 (306)                       | HOMO-6→LUMO ( $dz2 \rightarrow M-L\sigma^*$ )  | 0.0089               |
|           | 283                             | HOMO-12→LUMO ( $dxz \rightarrow M-L\sigma^*$ ) | 0.0677               |

## S1.2 Electrophilicity of Sn(IV) Reagents:

The observed electrophilicity ( $\omega$ ) order is  $\text{SnCl}_4 > \text{PhSnCl}_3 > \text{Me}_2\text{SnCl}_2$  (Fig. S2). The order suggested that substitution of chloride by phenyl increases the electron density at tin centre due to +R and -I effect of phenyl ring, which is further increase in alkyl substituted  $\text{Me}_2\text{SnCl}_2$  because of the +I effect of Me. So, it was expected that hydrolysis rate of the organotin(IV) reagents will also decrease in the same order  $\text{SnCl}_4 > \text{PhSnCl}_3 > \text{Me}_2\text{SnCl}_2$ , as generation of HCl will also depend upon the electron density at tin centre. Gratifyingly, the calculated LUMO energy of the three reagents suggested the faster hydrolysis in case of  $\text{SnCl}_4$  because of low lying LUMO compared to  $\text{PhSnCl}_3$  and  $\text{Me}_2\text{SnCl}_2$  (Fig. S2).

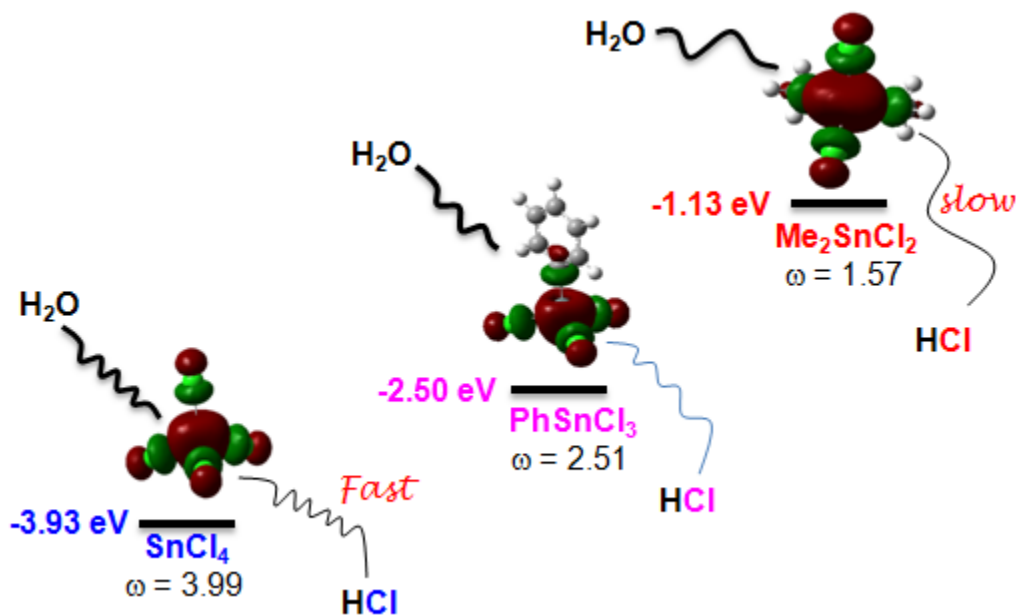

**Fig. S2** Relation between the rate of hydrolysis, LUMO, and electrophilicity of three organotin (IV) reagents.

### S1.3 Experimental and calculated transition of complex C6 and C7:

The reaction between **C1** and  $\text{SnI}_4$  also has been monitored with UV-vis spectroscopy. Upon gradual addition of  $\text{SnI}_4$  to **C1** in MeCN, two bands of **C1** at 352, and 310 nm disappeared, while a new peak at 302 nm and 458 nm appeared due to the generation of a new complexes (Fig. 6). To assign the UV-Vis transitions, we have performed TD-DFT calculations on **C6** and **C7**. Table S2 contains the key transitions. The first two transition for **C7** at 459 and 438 nm are assigned to iodine lone pair to  $\text{M-L}_{\sigma^*}$  orbital. The next two transitions at 324 and 312 nm are assigned to  $\pi$  orbital of DPAP ligand to  $\text{M-L}_{\sigma^*}$  orbital. The last two transitions at 282 and 271 nm are assigned to iodine lone pair and  $\pi$  orbital of DPAP to  $\text{M-L}_{\sigma^*}$  orbital. Similarly, the calculated values for **C6** are in close agreement with the experimental observed transitions. The transition at 408 and 374 nm for **C6** are assigned to bromine lone pair to  $\text{M-L}_{\sigma^*}$  transition. The transitions at 313, 303 and 298 nm are assigned to  $\text{L}_n \rightarrow \text{M-L}_{\sigma^*}$  transition while the transitions at 287 and 273 nm are assigned to bromine lone pair to ligand based  $\pi^*$  orbital of diphenyl phosphino amino pyridine (DPAP) ligand. The other two transition at 265 and 259 nm are assigned to bromine lone pair to  $\text{M-L}_{\pi^*}$  orbital.

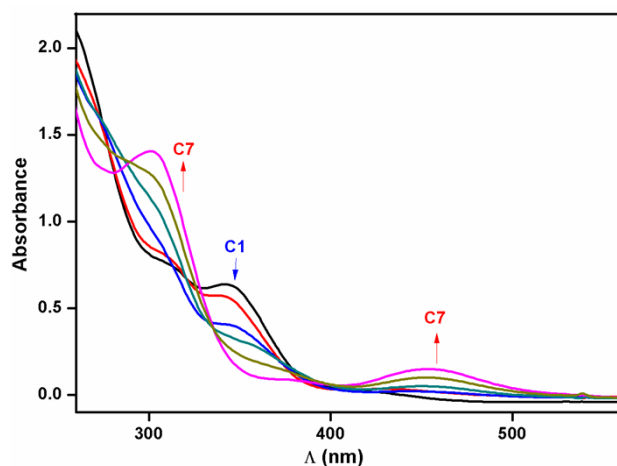

**Fig. S3.** UV-vis titration of complex C1 with SnI4 in MeCN solution.

**Table S2.** Key transitions in the TD-DFT computations for C6 and C7.

| Complex | Wavelength (nm) calculated<br>(Experimental) | Key Transition (Type)                                   | Osc. Strength<br>( <i>f</i> ) |
|---------|----------------------------------------------|---------------------------------------------------------|-------------------------------|
| C6      | 408                                          | HOMO-3→LUMO (Br <sub>(lp)</sub> → M-L <sub>σ*</sub> )   | 0.0175                        |
|         | 374 (372)                                    | HOMO-2→LUMO (Br <sub>(lp)</sub> → M-L <sub>σ*</sub> )   | 0.0152                        |
|         | 313 (310)                                    | HOMO-6→LUMO (L <sub>π</sub> → M-L <sub>σ*</sub> )       | 0.1236                        |
|         | 303                                          | HOMO-7→LUMO (L <sub>π</sub> → M-L <sub>σ*</sub> )       | 0.0633                        |
|         | 298                                          | HOMO-8→LUMO (L <sub>π</sub> → M-L <sub>σ*</sub> )       | 0.0147                        |
|         | 287 (278)                                    | HOMO→LUMO+1 (Br <sub>(lp)</sub> → L <sub>π*</sub> )     | 0.0856                        |
|         | 273                                          | HOMO-1→LUMO+1 (Br <sub>(lp)</sub> → L <sub>π*</sub> )   | 0.0613                        |
|         | 265                                          | HOMO→LUMO+2 (Br <sub>(lp)</sub> → M-L <sub>π*</sub> )   | 0.0382                        |
|         | 259                                          | HOMO-3→LUMO+2 (Br <sub>(lp)</sub> → M-L <sub>π*</sub> ) | 0.0254                        |
| C7      | 459 (458)                                    | HOMO→LUMO (L <sub>n</sub> → M-L <sub>σ*</sub> )         | 0.0201                        |
|         | 438                                          | HOMO-3→LUMO (L <sub>n</sub> → M-L <sub>σ*</sub> )       | 0.0135                        |
|         | 324                                          | HOMO-6→LUMO (L <sub>π</sub> → M-L <sub>σ*</sub> )       | 0.208                         |
|         | 312 (306)                                    | HOMO-8→LUMO (L <sub>π</sub> → M-L <sub>σ*</sub> )       | 0.0503                        |
|         | 282                                          | HOMO→LUMO+2 (I <sub>(lp)</sub> → M-L <sub>π*</sub> )    | 0.1112                        |
|         | 271                                          | HOMO-12→LUMO (I <sub>(n)</sub> → M-L <sub>σ*</sub> )    | 0.0856                        |

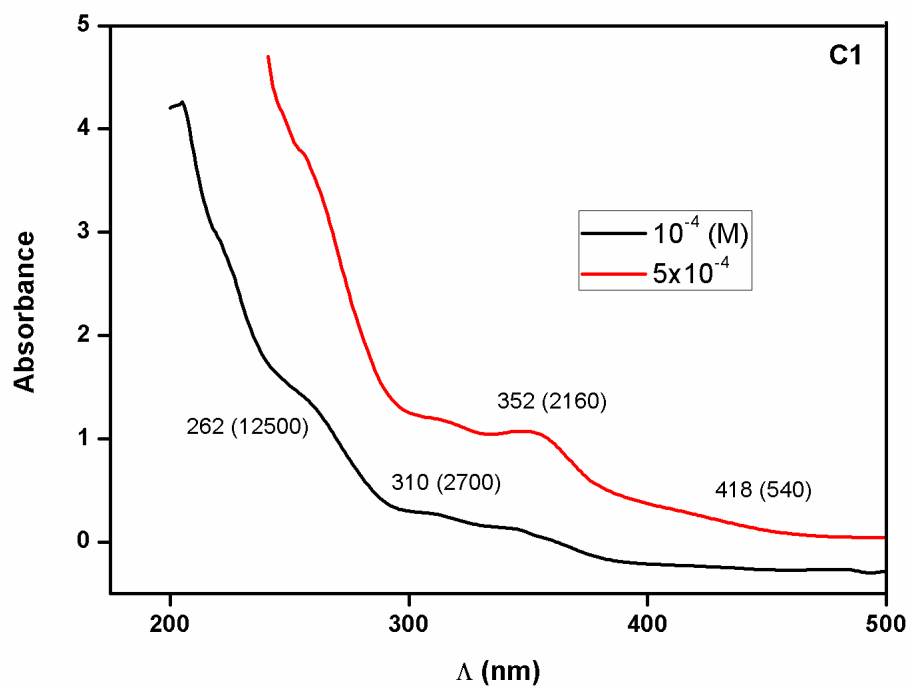

Fig. S4. UV-Vis spectra of C1

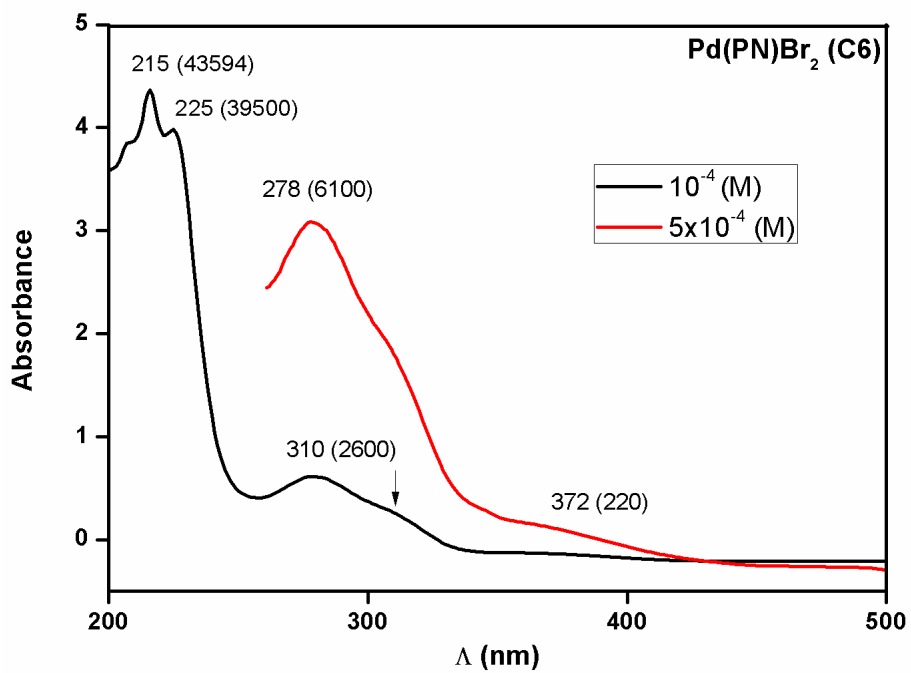

Fig. S5. UV-Vis spectra of C6

**S1.4  $^1\text{H}$  and  $^{31}\text{P}$ , and  $^{119}\text{Sn}$  NMR spectra of all the complexes:** all the spectra were recorded in  $\text{DMSO-d}_6$  at 298 K. solvent residual signals were highlighted in the spectra (DCE represents 1, 2-dichloroethane).<sup>1</sup>

**Fig. S6.**  $^1\text{H}$  and  $^{31}\text{P}$  NMR of C1 in  $\text{DMSO-d}_6$  at 298K

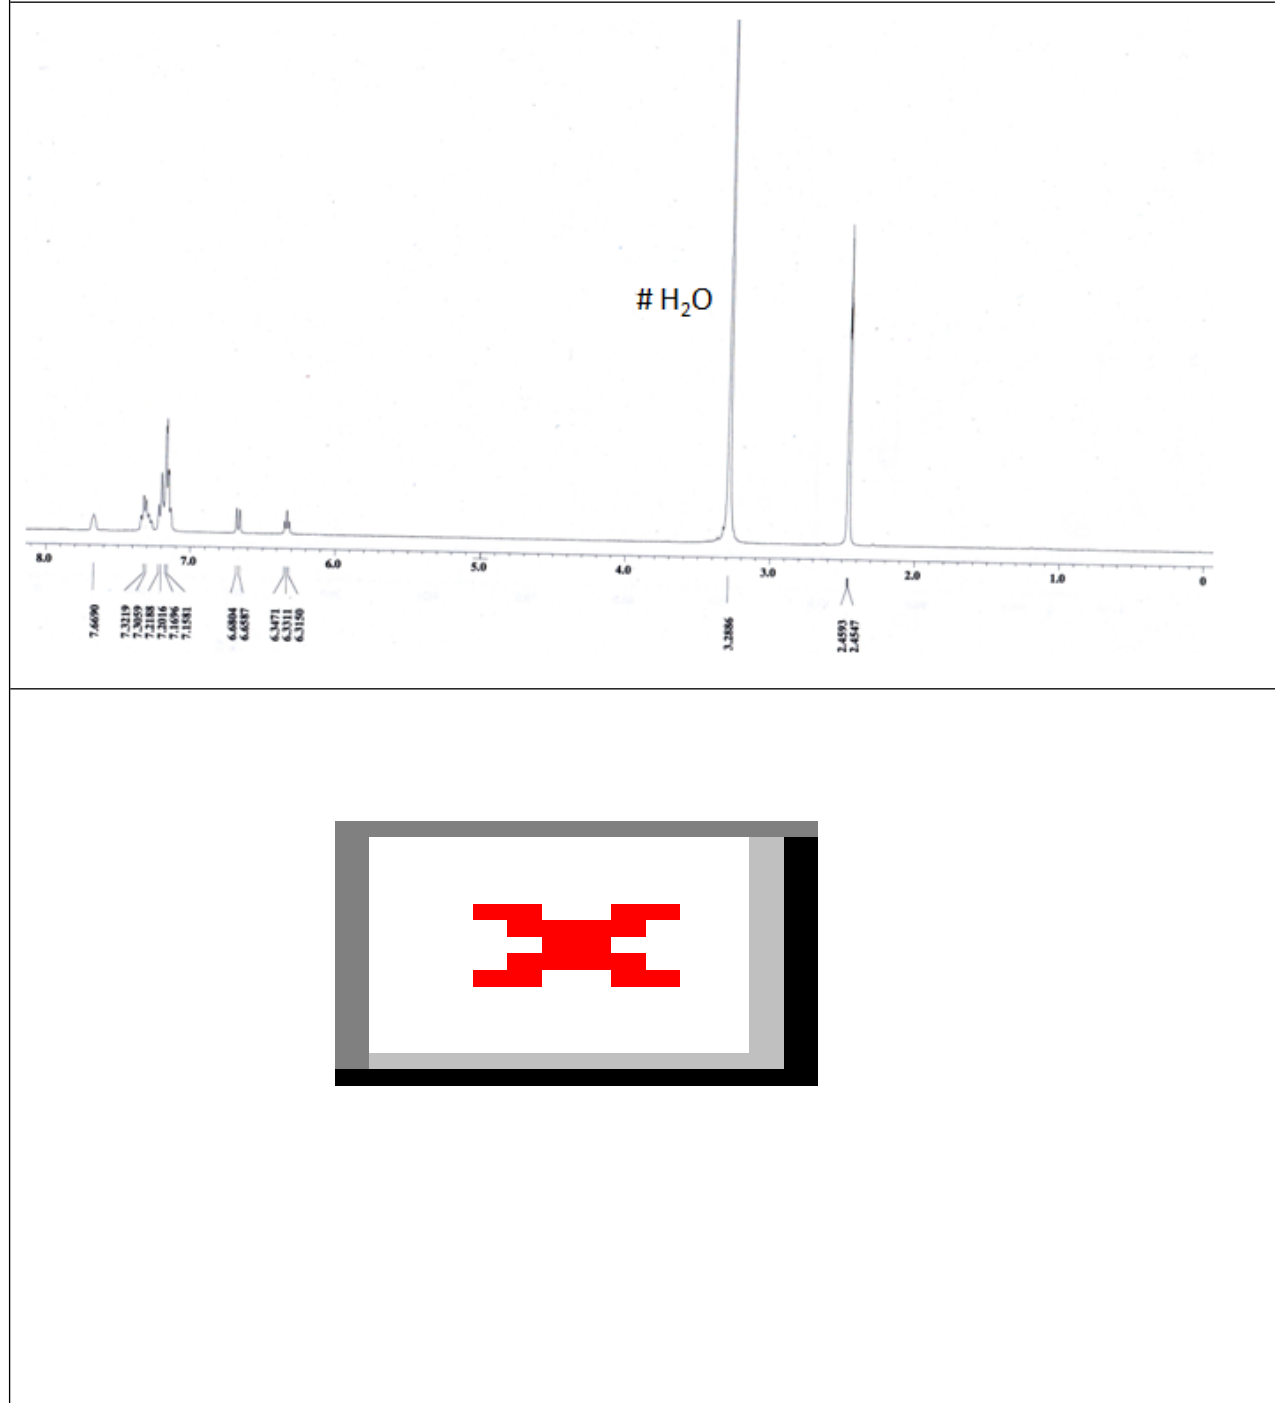

**Fig. S7.**  $^1\text{H}$  and  $^{31}\text{P}$  NMR of C2 in DMSO- $d_6$  at 298K

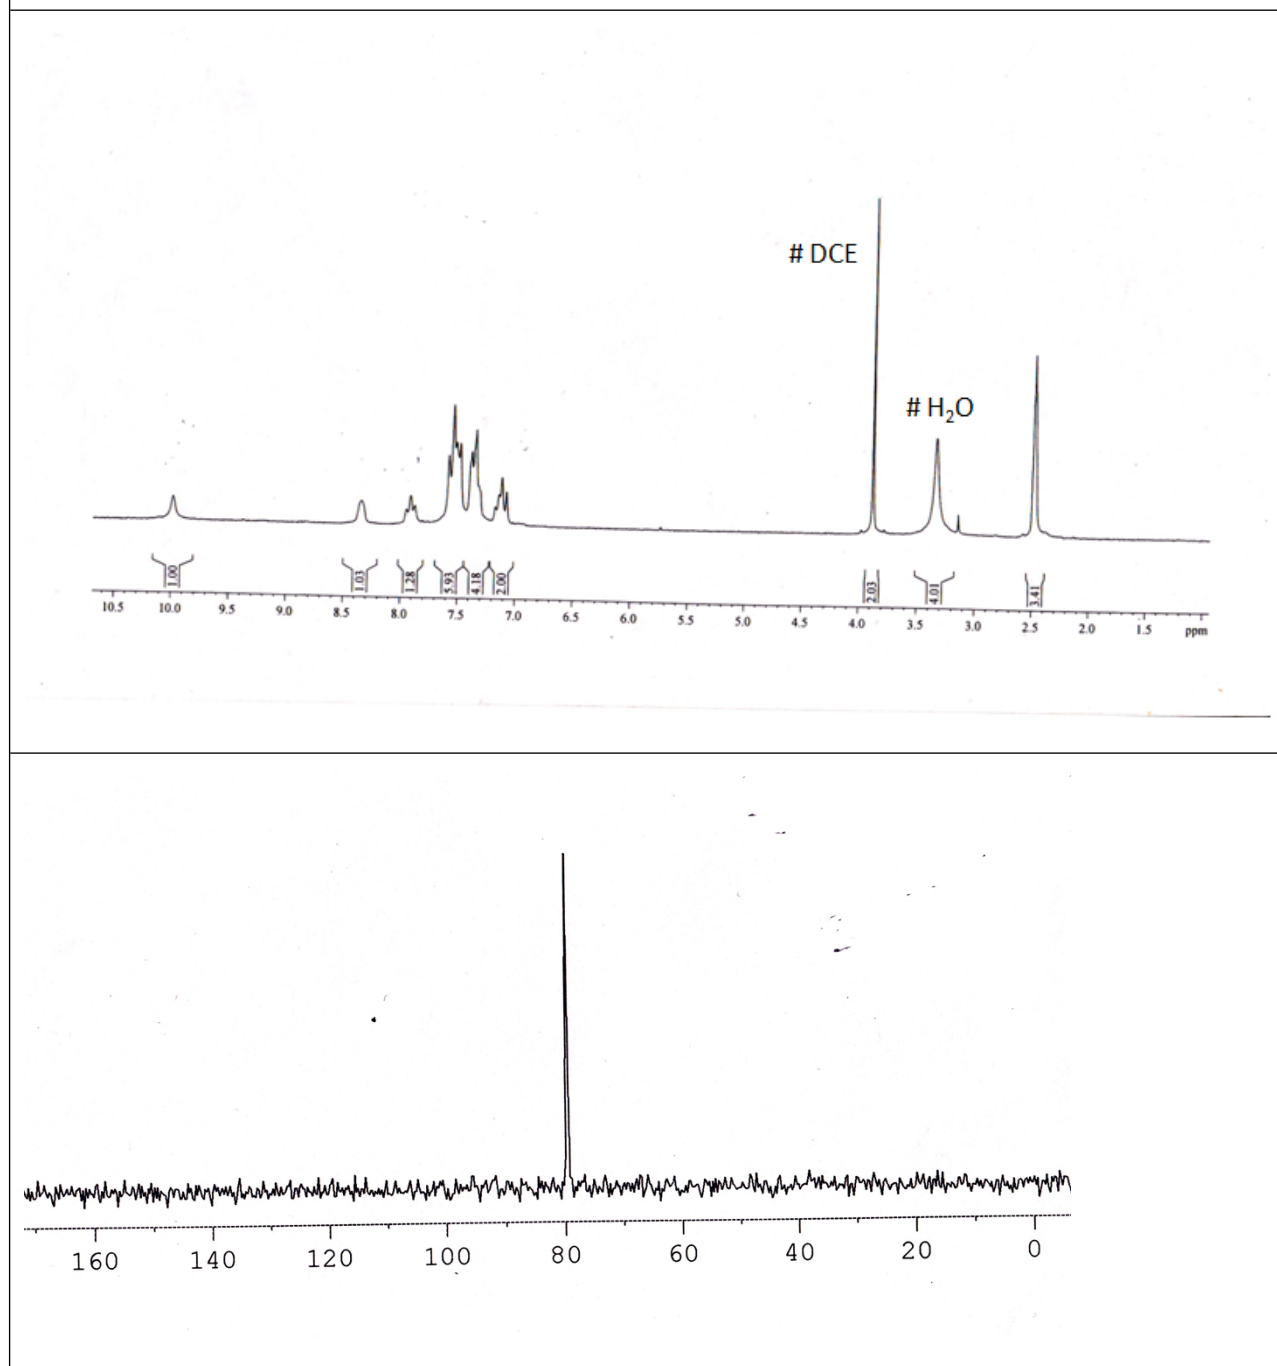



**Fig. S8.**  $^1\text{H}$ ,  $^{31}\text{P}$ , and  $^{119}\text{Sn}$  NMR of **C3** in  $\text{DMSO-d}_6$  at 298K

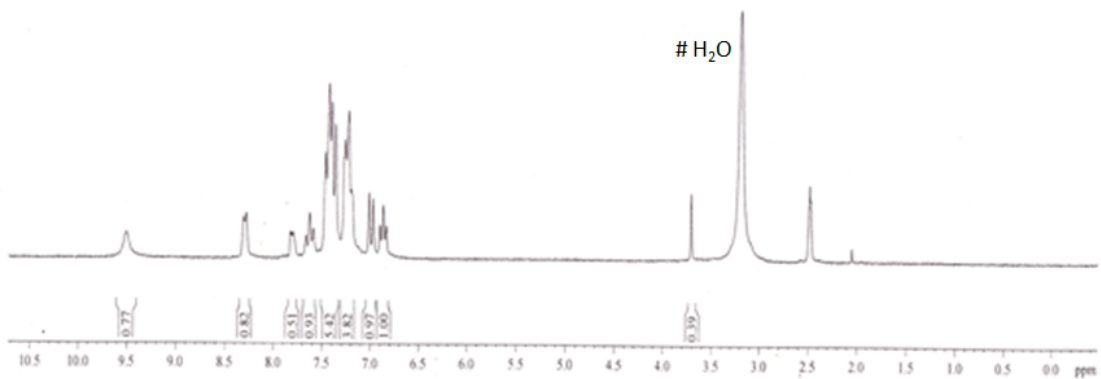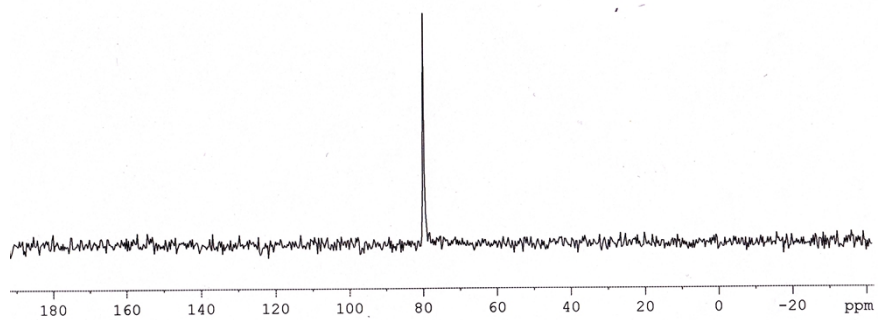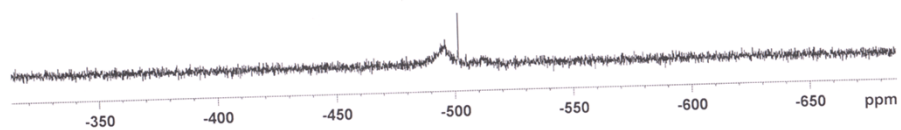

**Fig. S9.**  $^1\text{H}$ ,  $^{31}\text{P}$ , and  $^{119}\text{Sn}$  NMR of **C4** in  $\text{DMSO-d}_6$  at 298K

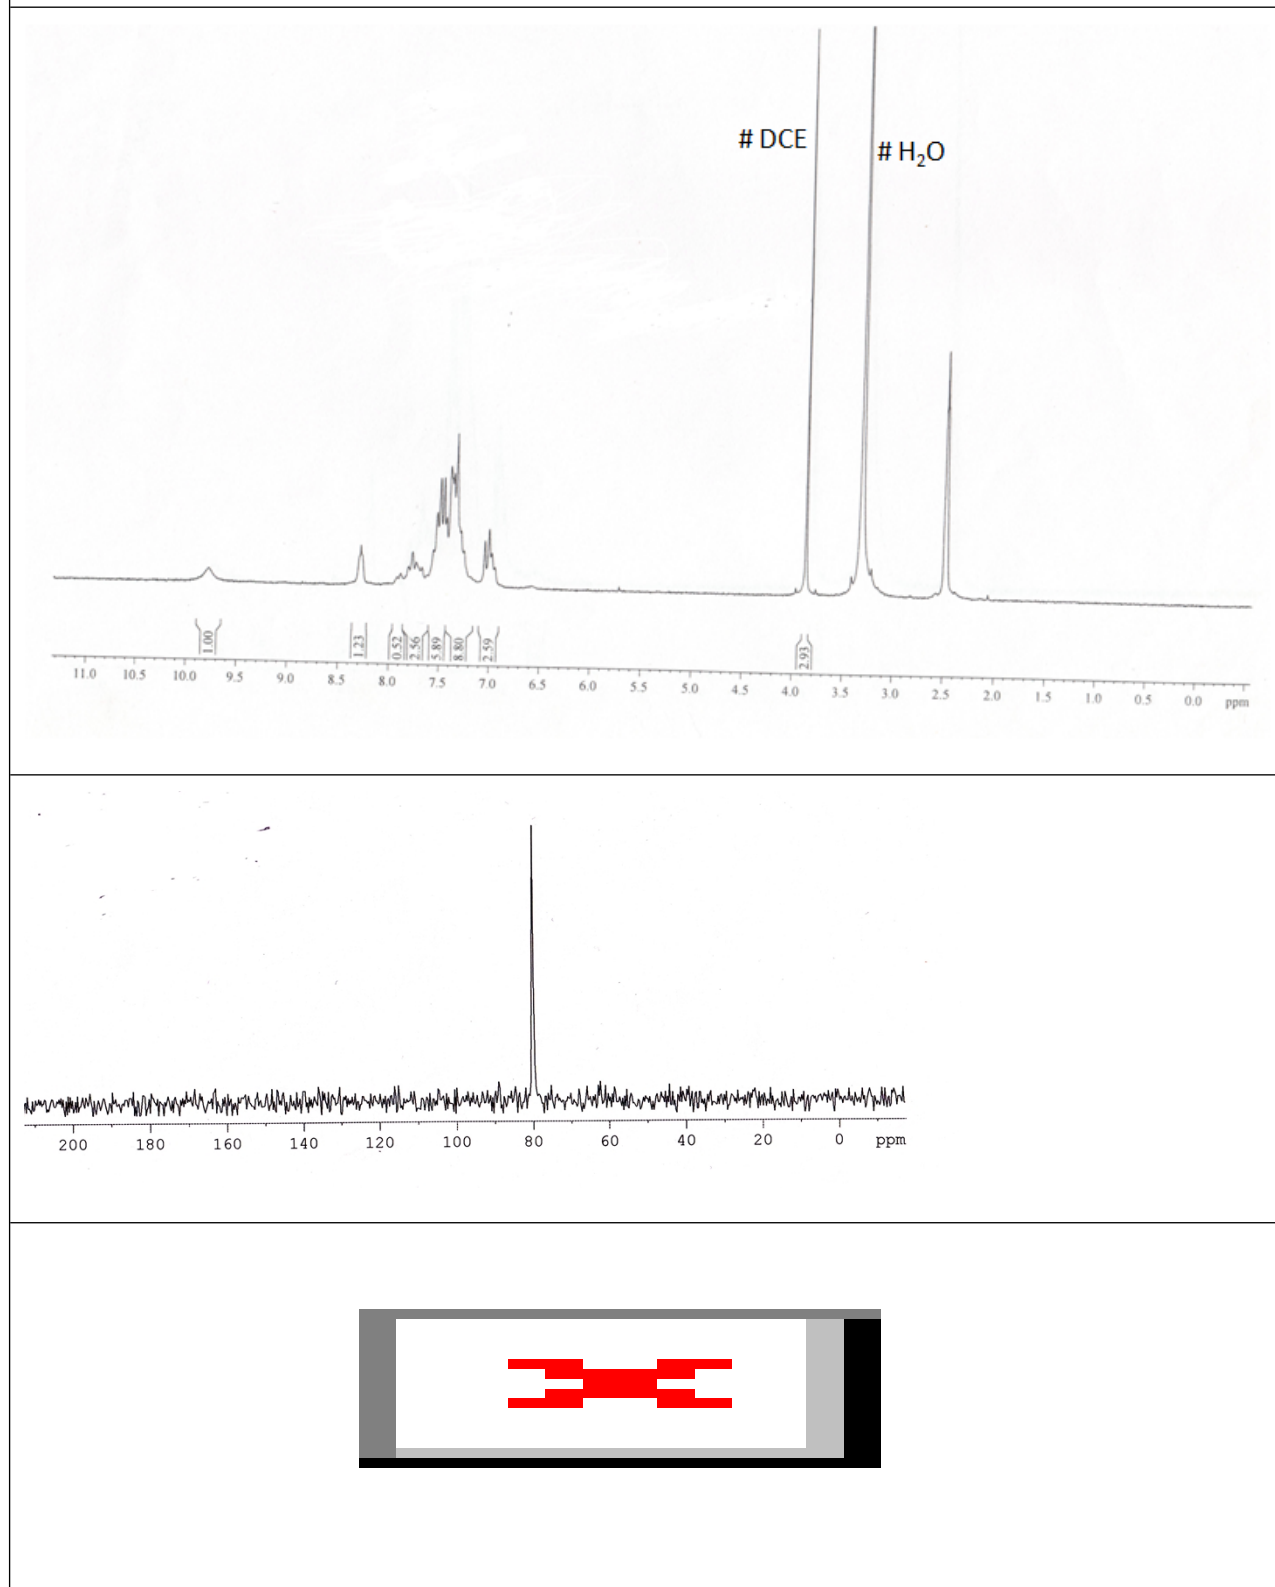

**Fig. S10**  $^1\text{H}$ ,  $^{31}\text{P}$ , and  $^{119}\text{Sn}$  NMR of **C5** in  $\text{DMSO-d}_6$  at 298K

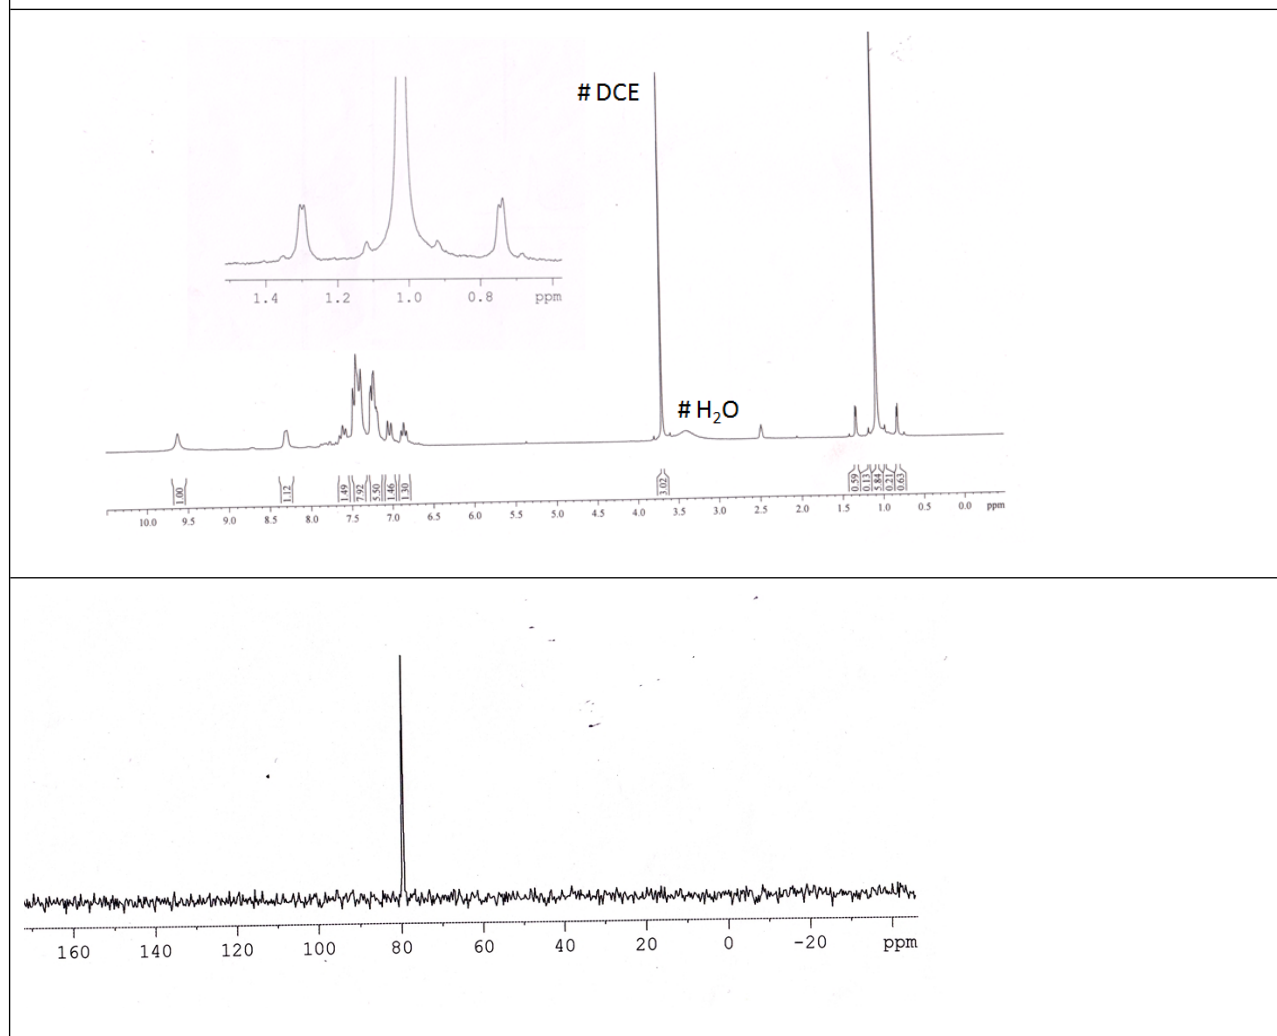

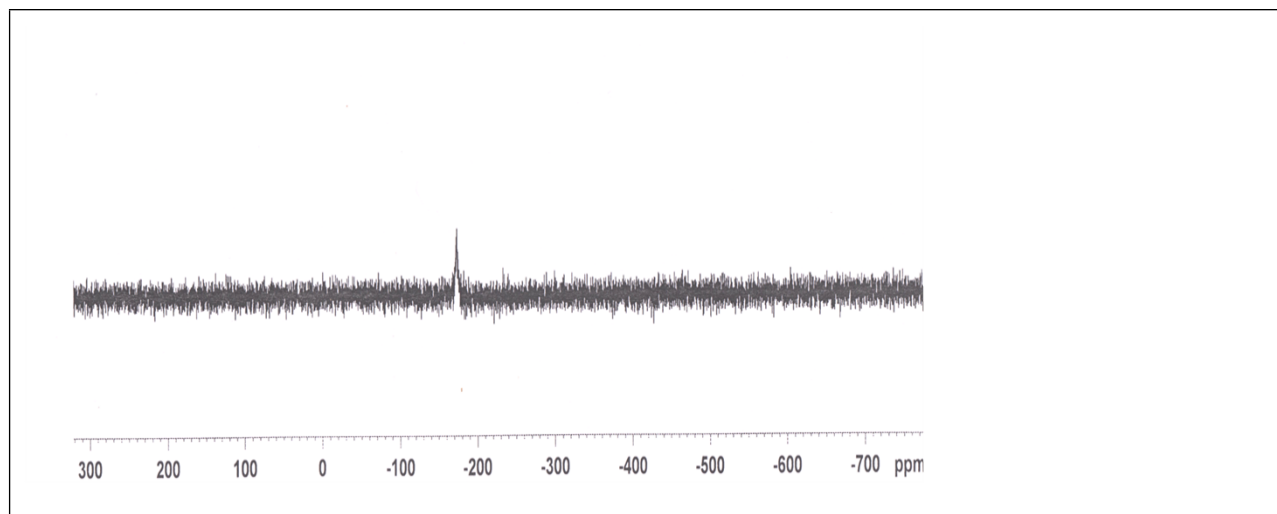

**Fig. S11**  $^1\text{H}$  and  $^{31}\text{P}$  NMR of **C6** in  $\text{DMSO-d}_6$  at 298K

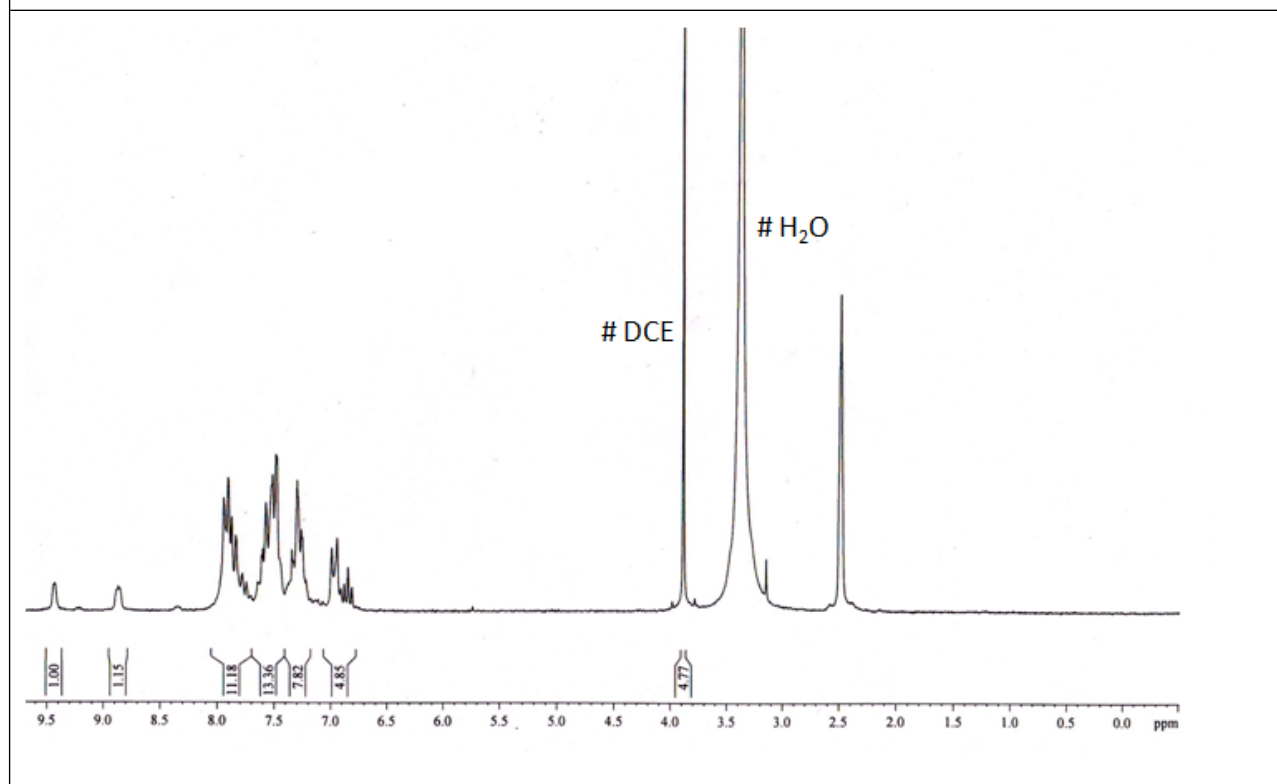

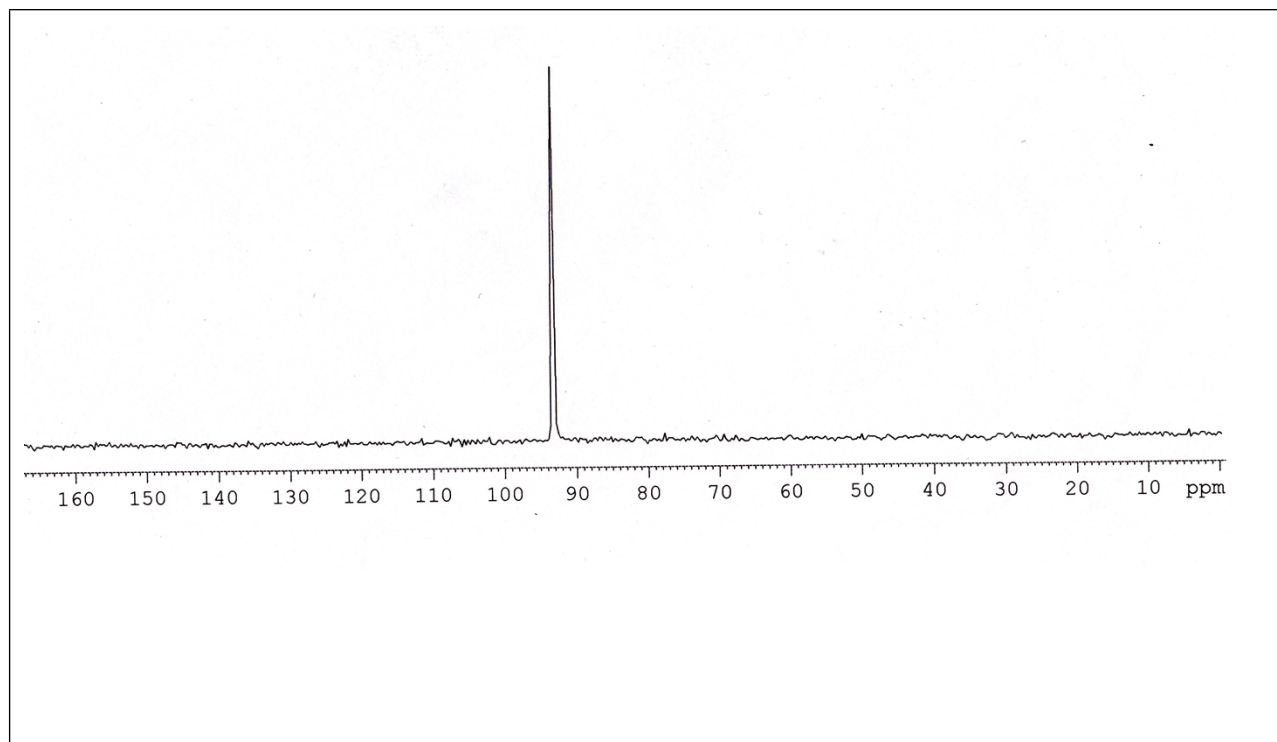

**Fig. S12**  $^1\text{H}$  and  $^{31}\text{P}$  NMR of C7 in DMSO- $\text{d}_6$  at 298K

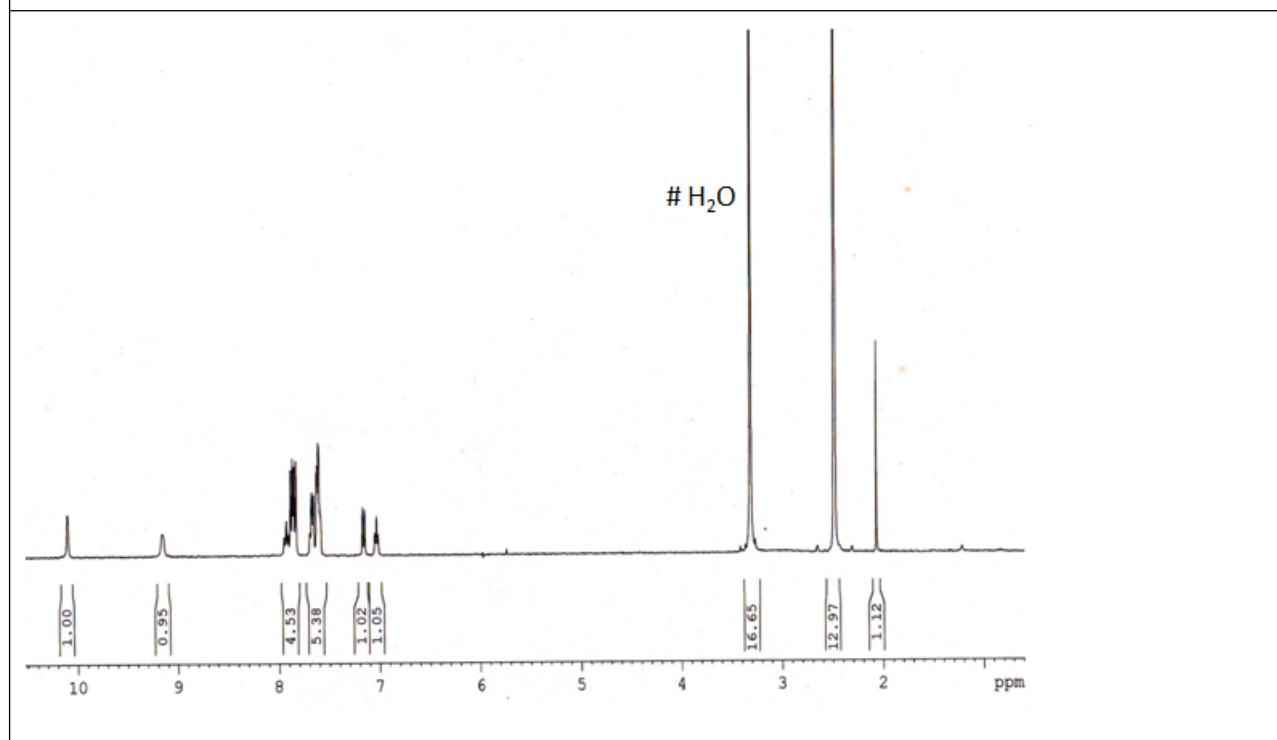

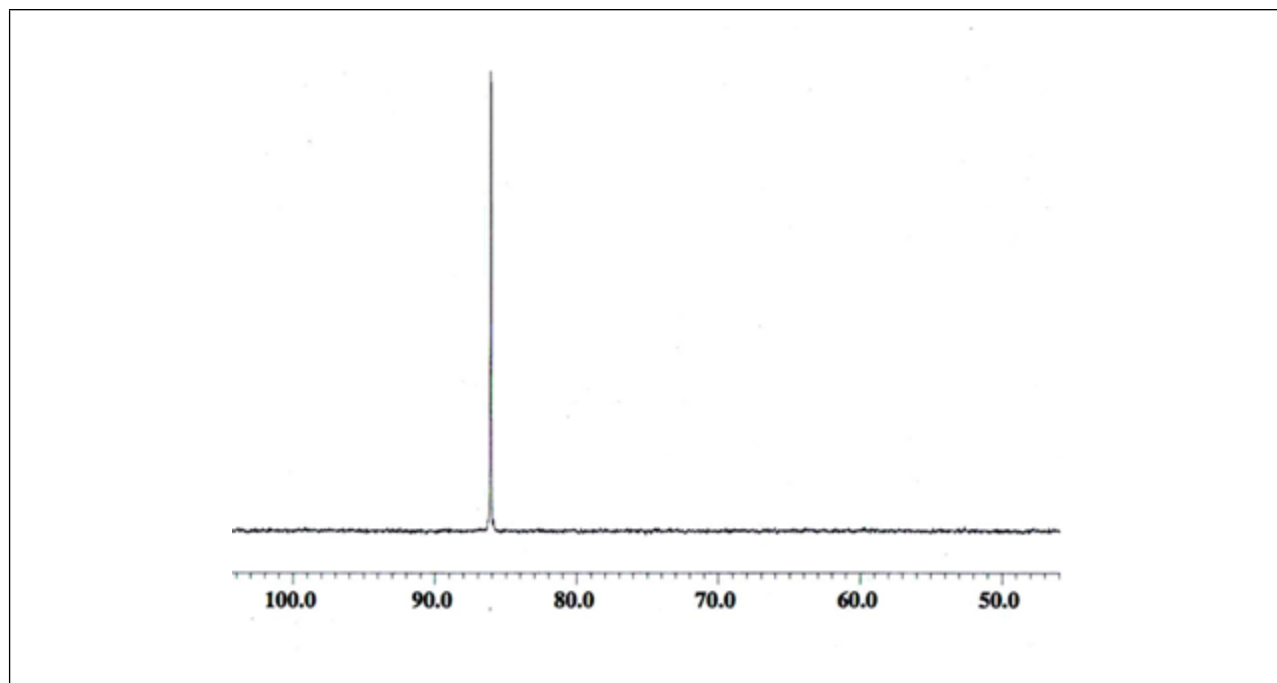

**$^1\text{H}$  and  $^{13}\text{C}$  NMR spectra of all the coupling products:** all the spectra were recorded in  $\text{CDCl}_3$  at 298 K. solvent residual signals were highlighted in the spectra.

---

**Fig. S13.**  $^1\text{H}$  and  $^{13}\text{C}$  NMR of **1a** in  $\text{CDCl}_3$  at 298K

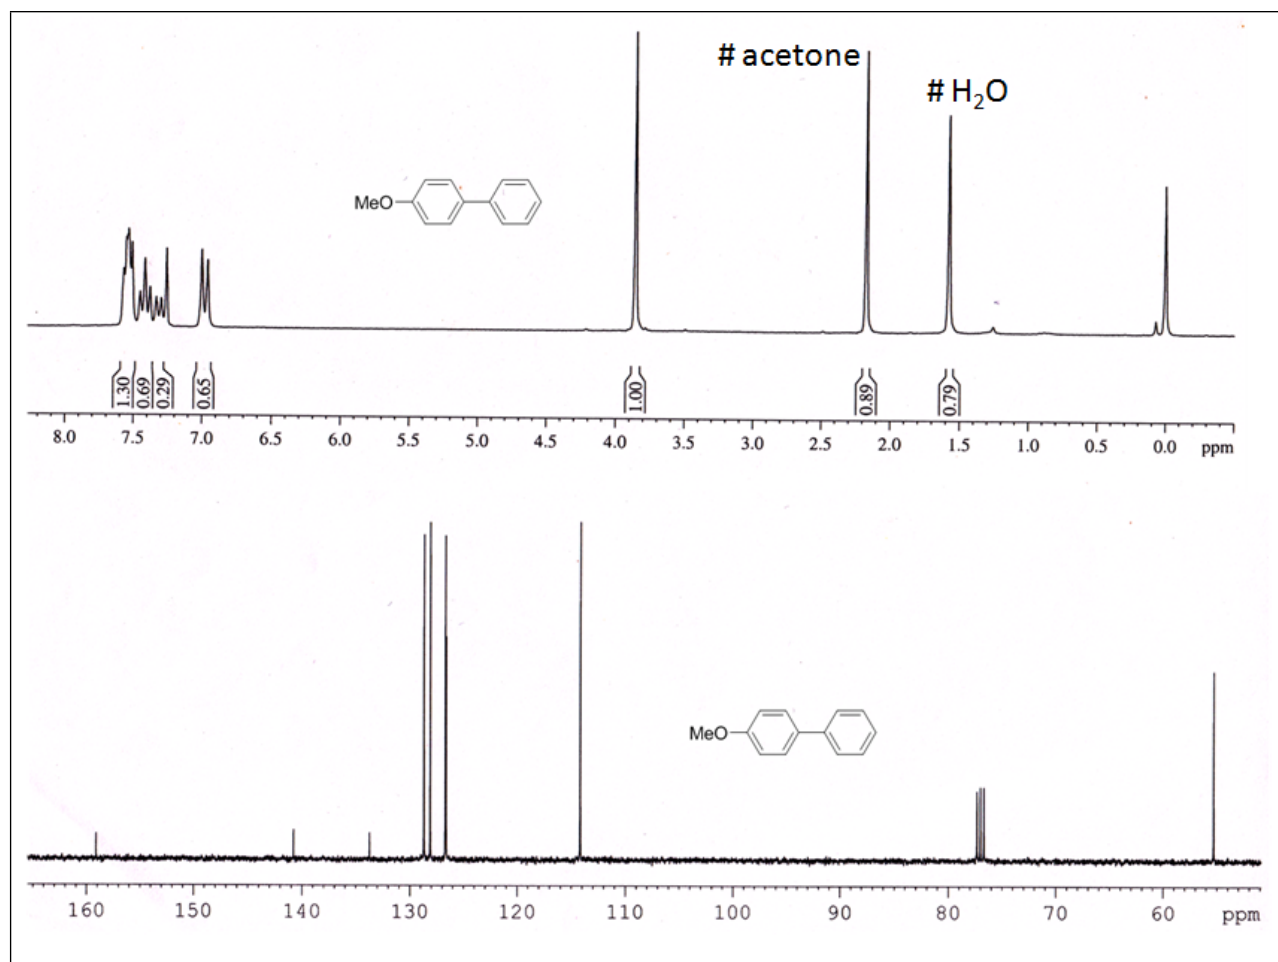

**Fig. S14.** <sup>1</sup>H and <sup>13</sup>C NMR of **1b** in CDCl<sub>3</sub> at 298K

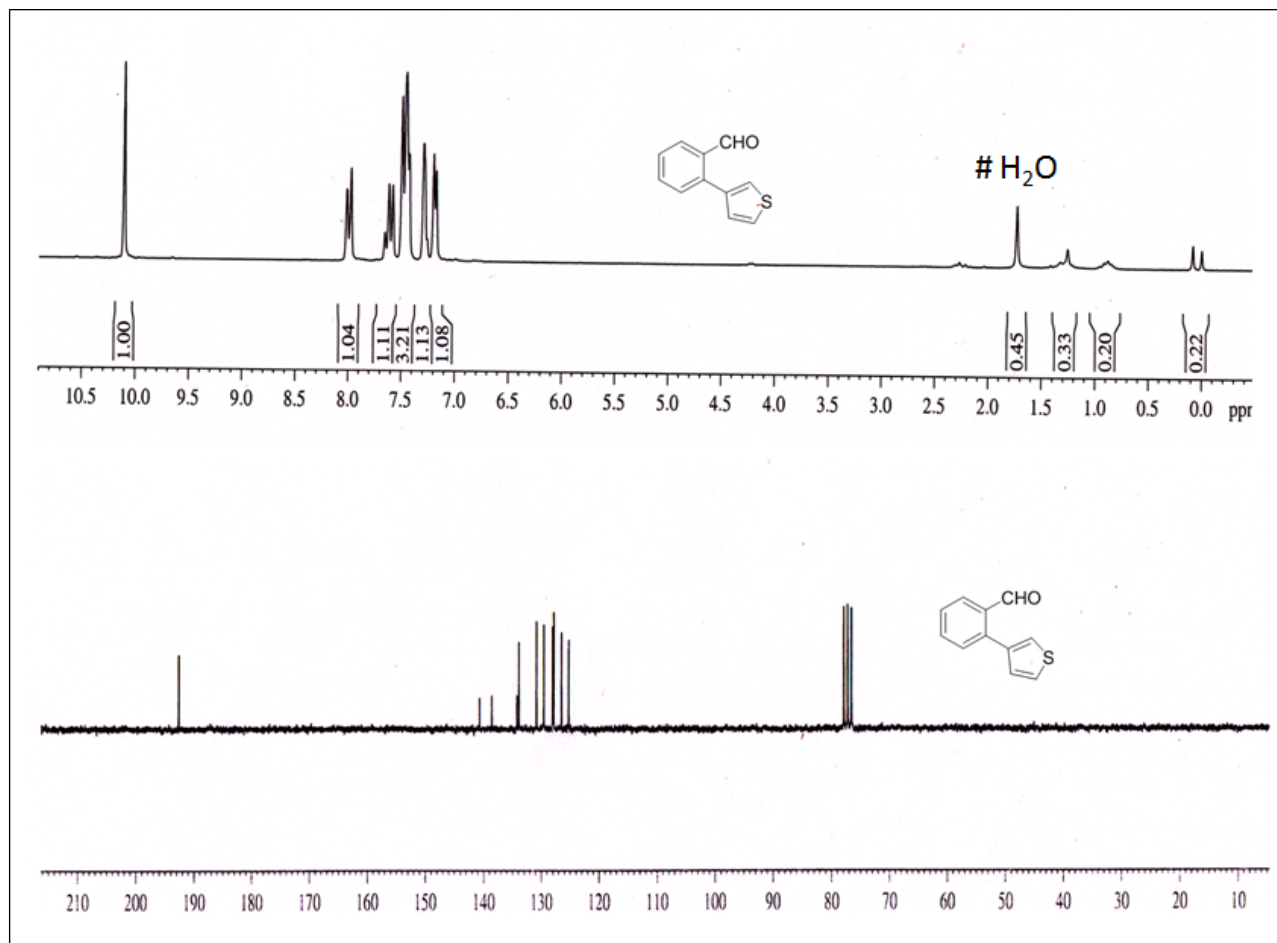



**Fig. S15.**  $^1\text{H}$  and  $^{13}\text{C}$  NMR of **1c** in  $\text{CDCl}_3$  at 298K

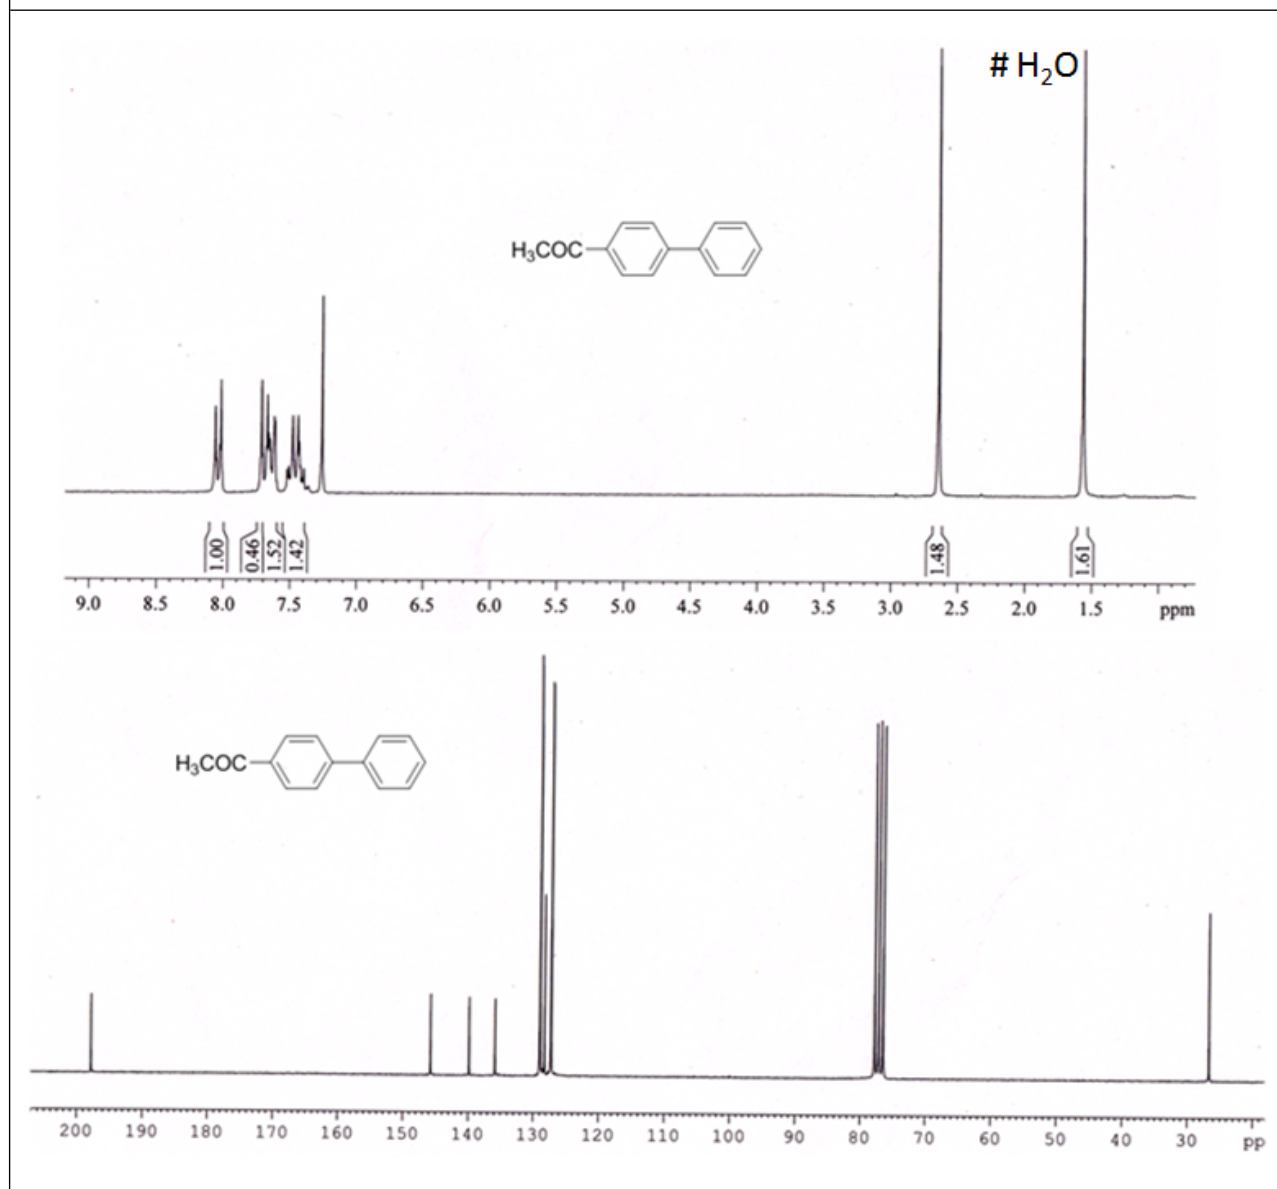

**Fig. S16.**  $^1\text{H}$  and  $^{13}\text{C}$  NMR of **1d** in  $\text{CDCl}_3$  at 298K

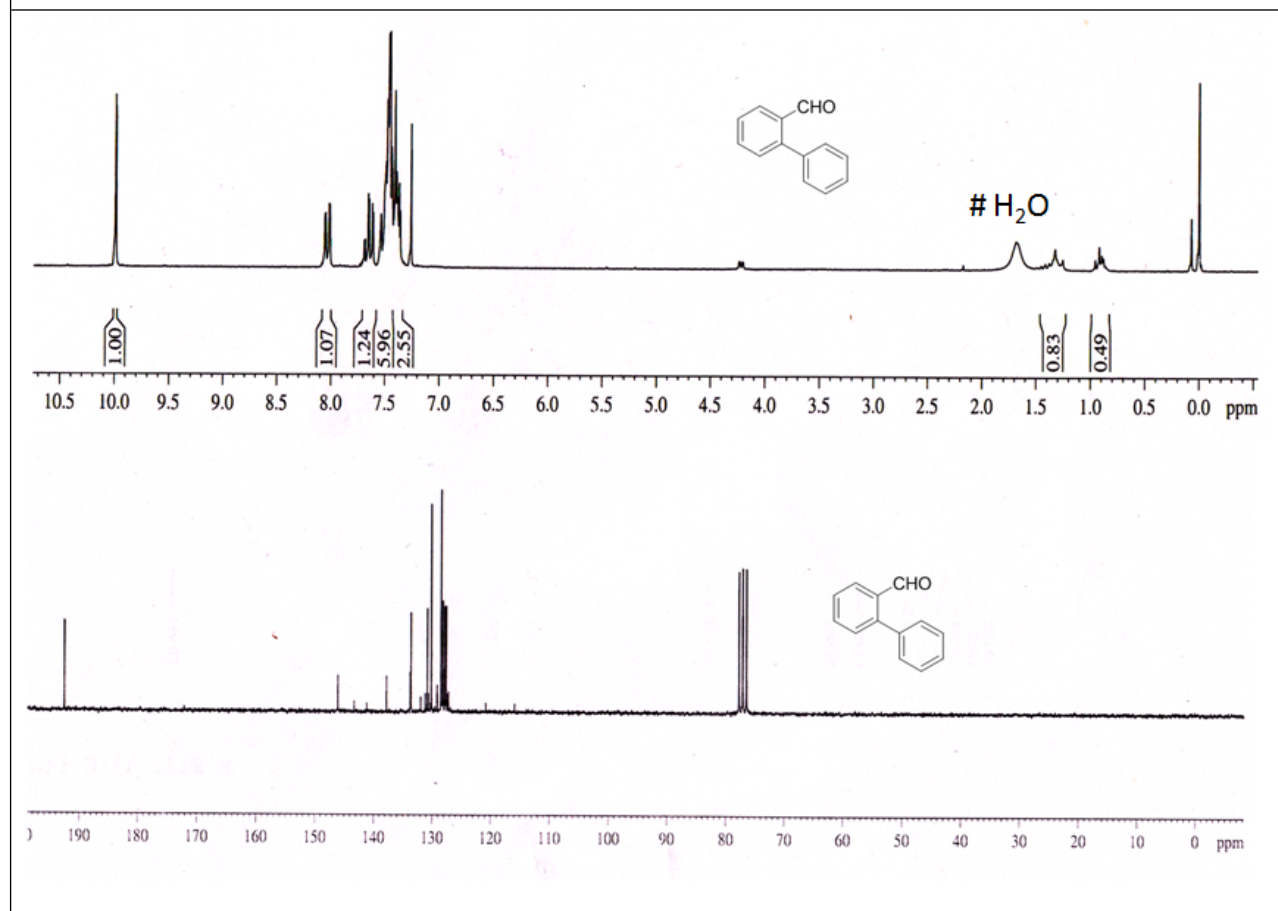

**Fig. S17.**  $^1\text{H}$  and  $^{13}\text{C}$  NMR of **1e** in  $\text{CDCl}_3$  at 298K

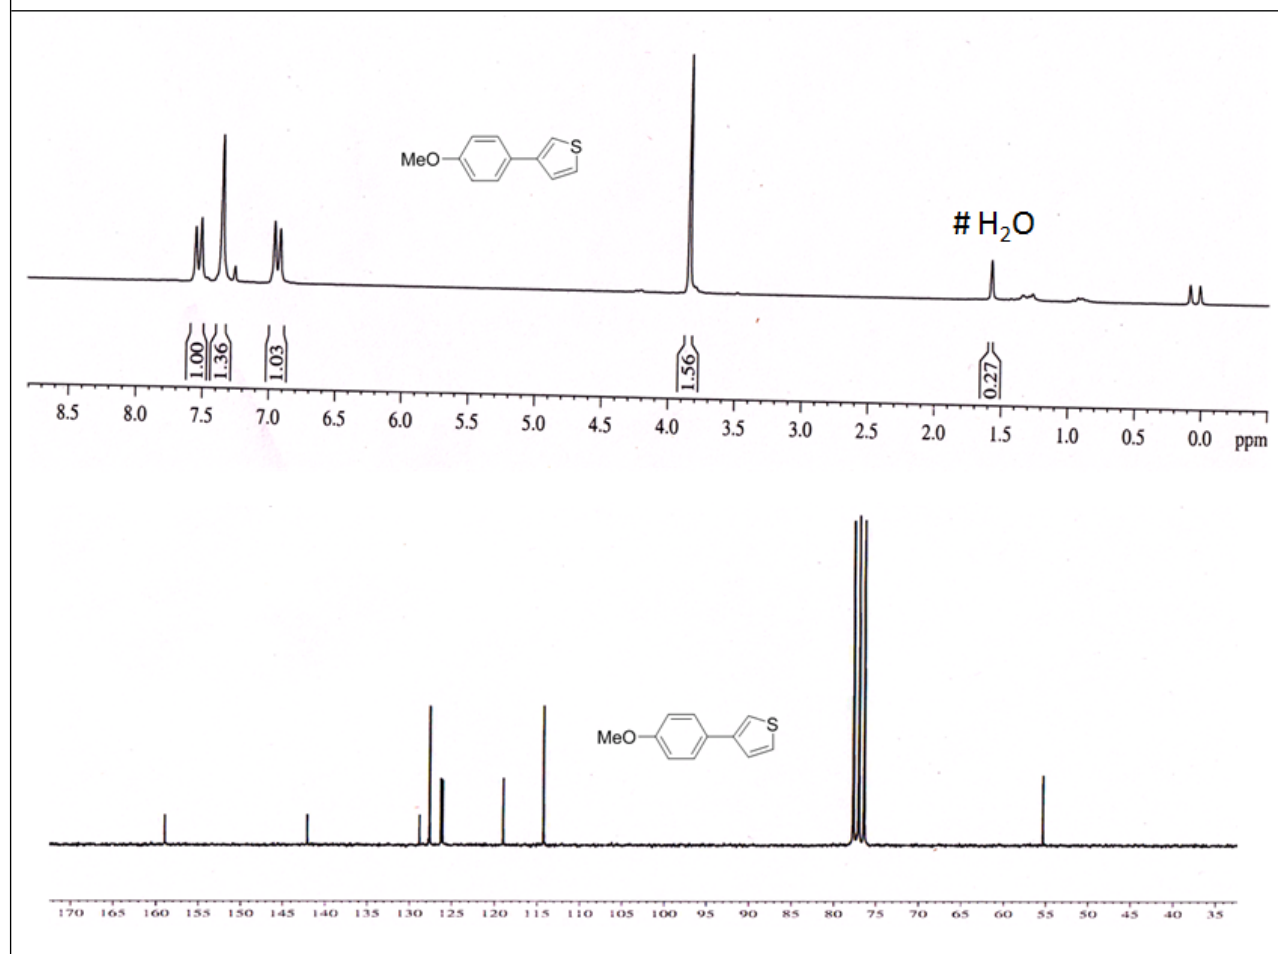

**Fig. S18.**  $^1\text{H}$  and  $^{13}\text{C}$  NMR of **1f** in  $\text{CDCl}_3$  at 298K

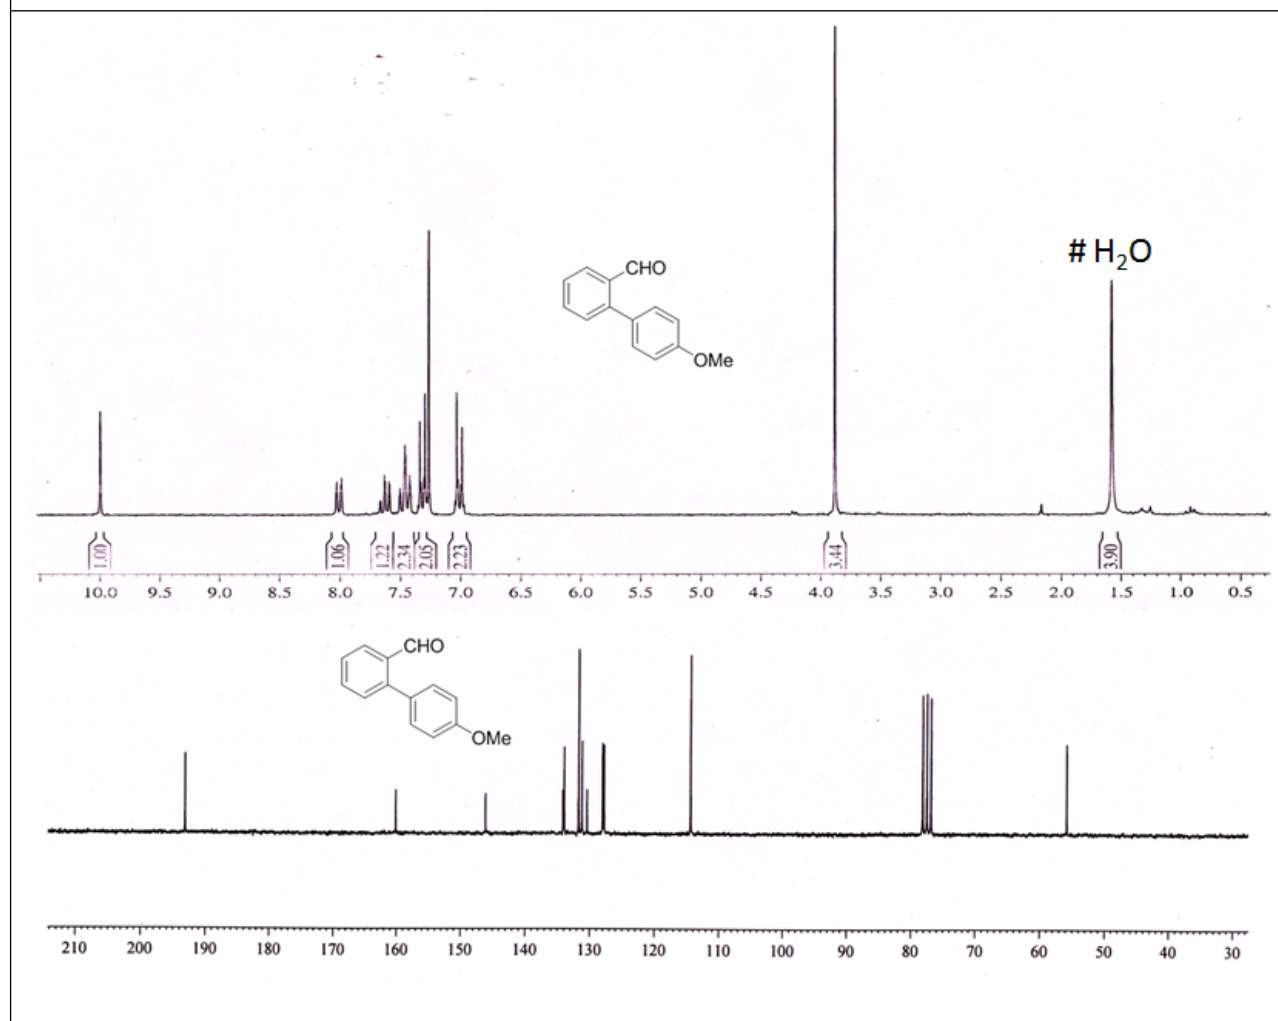

**Optimized Geometry:**

**C-1**

Cartesian Coordinates (Angstroms):

|    |    |   |           |           |           |
|----|----|---|-----------|-----------|-----------|
| 1  | 46 | 0 | 1.146112  | 0.000004  | 0.000023  |
| 2  | 15 | 0 | -0.207327 | 1.613812  | 0.770837  |
| 3  | 7  | 0 | 2.524374  | 1.546198  | 0.473435  |
| 4  | 6  | 0 | -1.567509 | 1.159438  | 1.881669  |
| 5  | 6  | 0 | -0.772961 | 2.382358  | -1.851051 |
| 6  | 1  | 0 | -0.285942 | 1.630519  | -2.100731 |
| 7  | 6  | 0 | -0.997761 | 2.650551  | -0.508258 |
| 8  | 6  | 0 | -1.294496 | 0.935536  | 3.209145  |
| 9  | 1  | 0 | -0.443099 | 1.113793  | 3.538194  |
| 10 | 6  | 0 | 2.039851  | 2.542102  | 1.275907  |
| 11 | 6  | 0 | 4.221422  | 3.605437  | 1.157649  |
| 12 | 1  | 0 | 4.823506  | 4.258787  | 1.432702  |
| 13 | 6  | 0 | 3.752968  | 1.663877  | -0.075944 |
| 14 | 1  | 0 | 4.028682  | 1.022473  | -0.690246 |
| 15 | 6  | 0 | 2.949226  | 3.576206  | 1.686516  |
| 16 | 1  | 0 | 2.681912  | 4.219343  | 2.302846  |
| 17 | 7  | 0 | 0.773052  | 2.570881  | 1.676275  |
| 18 | 6  | 0 | -2.264779 | 0.450041  | 4.061951  |
| 19 | 1  | 0 | -2.059870 | 0.288983  | 4.954632  |
| 20 | 6  | 0 | -2.858505 | 0.911652  | 1.408010  |
| 21 | 1  | 0 | -3.058113 | 1.044452  | 0.509472  |
| 22 | 6  | 0 | -1.727589 | 3.770175  | -0.156116 |
| 23 | 1  | 0 | -1.885089 | 3.956366  | 0.741358  |
| 24 | 6  | 0 | -2.219216 | 4.605436  | -1.120541 |
| 25 | 1  | 0 | -2.720735 | 5.350384  | -0.878697 |
| 26 | 6  | 0 | -3.845188 | 0.465617  | 2.282301  |
| 27 | 1  | 0 | -4.715887 | 0.344166  | 1.978865  |
| 28 | 6  | 0 | -1.268788 | 3.225557  | -2.806368 |
| 29 | 1  | 0 | -1.127888 | 3.039448  | -3.706642 |
| 30 | 6  | 0 | -1.973516 | 4.345340  | -2.442166 |
| 31 | 1  | 0 | -2.285335 | 4.929495  | -3.095301 |
| 32 | 6  | 0 | -3.531175 | 0.204780  | 3.595136  |
| 33 | 1  | 0 | -4.178462 | -0.138558 | 4.167734  |
| 34 | 6  | 0 | 4.600642  | 2.675556  | 0.229128  |
| 35 | 1  | 0 | 5.429838  | 2.736981  | -0.187583 |
| 36 | 15 | 0 | -0.207248 | -1.613817 | -0.770858 |
| 37 | 7  | 0 | 2.524451  | -1.546057 | -0.473484 |
| 38 | 6  | 0 | -1.567466 | -1.159516 | -1.881676 |
| 39 | 6  | 0 | -0.772814 | -2.382452 | 1.851116  |
| 40 | 1  | 0 | -0.285833 | -1.630587 | 2.100791  |
| 41 | 6  | 0 | -0.997614 | -2.650598 | 0.508245  |
| 42 | 6  | 0 | -1.294479 | -0.935598 | -3.209155 |
| 43 | 1  | 0 | -0.443076 | -1.113810 | -3.538212 |
| 44 | 6  | 0 | 2.039974  | -2.541987 | -1.275950 |
| 45 | 6  | 0 | 4.221603  | -3.605205 | -1.157715 |
| 46 | 1  | 0 | 4.823719  | -4.258443 | -1.432714 |
| 47 | 6  | 0 | 3.753057  | -1.663670 | 0.075883  |
| 48 | 1  | 0 | 4.028743  | -1.022172 | 0.690241  |

|    |   |   |           |           |           |
|----|---|---|-----------|-----------|-----------|
| 49 | 6 | 0 | 2.949399  | -3.576102 | -1.686488 |
| 50 | 1 | 0 | 2.682113  | -4.219193 | -2.302896 |
| 51 | 7 | 0 | 0.773173  | -2.570833 | -1.676306 |
| 52 | 6 | 0 | -2.264796 | -0.450156 | -4.061951 |
| 53 | 1 | 0 | -2.059905 | -0.289086 | -4.954633 |
| 54 | 6 | 0 | -2.858470 | -0.911718 | -1.407944 |
| 55 | 1 | 0 | -3.058062 | -1.044609 | -0.509464 |
| 56 | 6 | 0 | -1.727386 | -3.770261 | 0.156111  |
| 57 | 1 | 0 | -1.884886 | -3.956519 | -0.741281 |
| 58 | 6 | 0 | -2.218959 | -4.605548 | 1.120541  |
| 59 | 1 | 0 | -2.720440 | -5.350523 | 0.878702  |
| 60 | 6 | 0 | -3.845187 | -0.465816 | -2.282284 |
| 61 | 1 | 0 | -4.715888 | -0.344412 | -1.978840 |
| 62 | 6 | 0 | -1.268587 | -3.225619 | 2.806358  |
| 63 | 1 | 0 | -1.127687 | -3.039502 | 3.706631  |
| 64 | 6 | 0 | -1.973259 | -4.345439 | 2.442164  |
| 65 | 1 | 0 | -2.285040 | -4.929611 | 3.095301  |
| 66 | 6 | 0 | -3.531200 | -0.204962 | -3.595122 |
| 67 | 1 | 0 | -4.178513 | 0.138341  | -4.167714 |
| 68 | 6 | 0 | 4.600783  | -2.675223 | -0.229138 |
| 69 | 1 | 0 | 5.429987  | -2.736685 | 0.187504  |

## C-2

Cartesian Coordinates (Angstroms):

|    |   |   |           |           |           |
|----|---|---|-----------|-----------|-----------|
| 1  | 7 | 0 | 0.548081  | -2.737707 | 1.331459  |
| 2  | 1 | 0 | 0.210789  | -3.287791 | 1.899948  |
| 3  | 6 | 0 | -0.624739 | 2.410273  | 1.806518  |
| 4  | 1 | 0 | -0.040248 | 1.731099  | 2.055458  |
| 5  | 7 | 0 | 1.030032  | 2.429191  | -1.573669 |
| 6  | 1 | 0 | 0.800902  | 2.919031  | -2.242339 |
| 7  | 6 | 0 | -2.667445 | -2.912260 | -0.068941 |
| 8  | 1 | 0 | -2.910301 | -2.918599 | 0.828754  |
| 9  | 6 | 0 | 4.405790  | -3.127499 | 0.105820  |
| 10 | 1 | 0 | 5.294929  | -3.172288 | -0.163170 |
| 11 | 6 | 0 | -0.824898 | -0.880957 | 3.352151  |
| 12 | 1 | 0 | 0.045561  | -1.194442 | 3.447195  |
| 13 | 6 | 0 | -1.530781 | -2.249836 | -0.466025 |
| 14 | 6 | 0 | -3.479842 | -3.593525 | -1.033516 |
| 15 | 1 | 0 | -4.225589 | -4.075791 | -0.757416 |
| 16 | 6 | 0 | -2.035197 | -2.869353 | -2.766610 |
| 17 | 1 | 0 | -1.829793 | -2.817478 | -3.672112 |
| 18 | 6 | 0 | -1.206123 | -2.274260 | -1.817079 |
| 19 | 1 | 0 | -0.410874 | -1.881214 | -2.096545 |
| 20 | 6 | 0 | -0.907868 | 2.625718  | 0.479906  |
| 21 | 6 | 0 | 1.853932  | -2.877368 | 0.947837  |
| 22 | 6 | 0 | -2.713922 | 0.134538  | 4.275980  |
| 23 | 1 | 0 | -3.144031 | 0.549742  | 4.988413  |
| 24 | 6 | 0 | -2.234835 | 4.477607  | 1.019353  |

|    |    |   |           |           |           |
|----|----|---|-----------|-----------|-----------|
| 25 | 1  | 0 | -2.767934 | 5.190292  | 0.749710  |
| 26 | 6  | 0 | -3.160073 | -3.533476 | -2.343638 |
| 27 | 1  | 0 | -3.709608 | -3.948017 | -2.968851 |
| 28 | 6  | 0 | -1.227191 | 3.227212  | 2.792229  |
| 29 | 1  | 0 | -1.068661 | 3.079558  | 3.696679  |
| 30 | 6  | 0 | 3.810743  | -4.183896 | 0.695658  |
| 31 | 1  | 0 | 4.283785  | -4.979218 | 0.789172  |
| 32 | 6  | 0 | -2.054904 | 4.247425  | 2.376818  |
| 33 | 1  | 0 | -2.490926 | 4.779394  | 3.002662  |
| 34 | 6  | 0 | -1.472927 | -0.397942 | 4.486508  |
| 35 | 1  | 0 | -1.086555 | -0.435295 | 5.331735  |
| 36 | 6  | 0 | -1.641949 | 3.674412  | 0.050260  |
| 37 | 1  | 0 | -1.747027 | 3.852583  | -0.856433 |
| 38 | 6  | 0 | -0.980715 | 0.842535  | -3.294671 |
| 39 | 1  | 0 | -0.090371 | 0.921893  | -3.551143 |
| 40 | 6  | 0 | -2.718882 | 1.001690  | -1.627921 |
| 41 | 1  | 0 | -3.023697 | 1.171459  | -0.765858 |
| 42 | 6  | 0 | -1.944002 | 0.427161  | -4.209562 |
| 43 | 1  | 0 | -1.688791 | 0.241928  | -5.084408 |
| 44 | 6  | 0 | -3.560573 | 0.605427  | -2.612763 |
| 45 | 1  | 0 | -4.458280 | 0.558899  | -2.374296 |
| 46 | 6  | 0 | -3.294232 | 0.280951  | -3.843051 |
| 47 | 1  | 0 | -3.944652 | -0.023703 | -4.433971 |
| 48 | 6  | 0 | -1.375340 | 1.142767  | -1.967363 |
| 49 | 46 | 0 | 1.199309  | -0.118078 | -0.005827 |
| 50 | 15 | 0 | -0.404182 | -1.502881 | 0.704434  |
| 51 | 15 | 0 | -0.123002 | 1.528786  | -0.748839 |
| 52 | 7  | 0 | 2.680235  | 1.350299  | -0.383234 |
| 53 | 7  | 0 | 2.423840  | -1.819111 | 0.355471  |
| 54 | 6  | 0 | 3.923980  | 1.357721  | 0.072858  |
| 55 | 1  | 0 | 4.167575  | 0.686977  | 0.669111  |
| 56 | 6  | 0 | -2.622520 | -0.385470 | 1.969948  |
| 57 | 1  | 0 | -3.006809 | -0.326290 | 1.125158  |
| 58 | 6  | 0 | 2.504277  | -4.109581 | 1.167236  |
| 59 | 1  | 0 | 2.088917  | -4.822062 | 1.596873  |
| 60 | 6  | 0 | 4.876520  | 2.278236  | -0.267931 |
| 61 | 1  | 0 | 5.735843  | 2.231813  | 0.084734  |
| 62 | 6  | 0 | 3.653668  | -1.957731 | -0.093589 |
| 63 | 1  | 0 | 4.039998  | -1.252978 | -0.561526 |
| 64 | 6  | 0 | -1.386073 | -0.922727 | 2.114204  |
| 65 | 6  | 0 | -3.333310 | 0.087909  | 3.106837  |
| 66 | 1  | 0 | -4.219233 | 0.360359  | 3.030338  |
| 67 | 6  | 0 | 2.337368  | 2.376379  | -1.172381 |
| 68 | 6  | 0 | 3.278585  | 3.352824  | -1.619156 |
| 69 | 1  | 0 | 3.024664  | 4.017308  | -2.218180 |
| 70 | 6  | 0 | 4.517964  | 3.292895  | -1.164023 |
| 71 | 1  | 0 | 5.147737  | 3.920310  | -1.437181 |

**C-6**

Cartesian Coordinates (Angstroms):

|    |    |   |           |           |           |
|----|----|---|-----------|-----------|-----------|
| 1  | 46 | 0 | 1.048153  | -0.473358 | -0.088404 |
| 2  | 15 | 0 | -0.947634 | 0.546859  | 0.065242  |
| 3  | 35 | 0 | 3.239011  | -1.487798 | -0.254087 |
| 4  | 7  | 0 | -0.420448 | 2.185887  | 0.247597  |
| 5  | 7  | 0 | 1.812043  | 1.491240  | 0.123934  |
| 6  | 6  | 0 | 0.925969  | 2.504325  | 0.286902  |
| 7  | 6  | 0 | -2.010040 | 0.219483  | 1.512207  |
| 8  | 6  | 0 | -2.069601 | 0.585794  | -1.372347 |
| 9  | 6  | 0 | 3.134566  | 1.768029  | 0.133351  |
| 10 | 1  | 0 | 3.774783  | 0.902760  | -0.004174 |
| 11 | 6  | 0 | 1.355796  | 3.828173  | 0.478051  |
| 12 | 1  | 0 | 0.623124  | 4.618357  | 0.608939  |
| 13 | 6  | 0 | -2.888146 | -0.529469 | -1.620774 |
| 14 | 1  | 0 | -2.866432 | -1.380578 | -0.947686 |
| 15 | 6  | 0 | -3.305519 | 0.755985  | 1.601039  |
| 16 | 1  | 0 | -3.724827 | 1.317189  | 0.770182  |
| 17 | 6  | 0 | -3.708739 | -0.551403 | -2.747155 |
| 18 | 1  | 0 | -4.335255 | -1.418195 | -2.936618 |
| 19 | 6  | 0 | -2.072004 | 1.662547  | -2.270914 |
| 20 | 1  | 0 | -1.425209 | 2.517279  | -2.097638 |
| 21 | 6  | 0 | 3.626392  | 3.051260  | 0.312165  |
| 22 | 1  | 0 | 4.697061  | 3.220795  | 0.313658  |
| 23 | 6  | 0 | 2.715719  | 4.097155  | 0.490689  |
| 24 | 1  | 0 | 3.062723  | 5.116011  | 0.637186  |
| 25 | 6  | 0 | -1.495003 | -0.536789 | 2.576337  |
| 26 | 1  | 0 | -0.507391 | -0.980033 | 2.492835  |
| 27 | 6  | 0 | -3.719558 | 0.529944  | -3.632118 |
| 28 | 1  | 0 | -4.360002 | 0.507676  | -4.509474 |
| 29 | 6  | 0 | -3.547508 | -0.194903 | 3.811037  |
| 30 | 1  | 0 | -4.146414 | -0.358944 | 4.702717  |
| 31 | 6  | 0 | -4.067654 | 0.552393  | 2.750856  |
| 32 | 1  | 0 | -5.069393 | 0.968116  | 2.815249  |
| 33 | 6  | 0 | -2.265549 | -0.740793 | 3.721654  |
| 34 | 1  | 0 | -1.866324 | -1.335490 | 4.538115  |
| 35 | 6  | 0 | -2.900269 | 1.634600  | -3.393923 |
| 36 | 1  | 0 | -2.899908 | 2.473929  | -4.083779 |
| 37 | 1  | 0 | -1.070622 | 2.931184  | 0.467090  |
| 38 | 35 | 0 | -0.092745 | -2.600383 | -0.263104 |

**C-7**

Cartesian Coordinates (Angstroms):

|   |    |   |           |           |           |
|---|----|---|-----------|-----------|-----------|
| 1 | 46 | 0 | 0.859716  | -0.085497 | -0.032529 |
| 2 | 15 | 0 | -1.243331 | 0.701747  | 0.038592  |
| 3 | 53 | 0 | 3.336314  | -0.904547 | -0.120373 |



|    |    |   |           |           |           |
|----|----|---|-----------|-----------|-----------|
| 4  | 7  | 0 | -0.913125 | 2.399001  | 0.127405  |
| 5  | 7  | 0 | 1.386695  | 1.963950  | 0.069074  |
| 6  | 6  | 0 | 0.386363  | 2.874347  | 0.161496  |
| 7  | 6  | 0 | -2.285551 | 0.337811  | 1.491492  |
| 8  | 6  | 0 | -2.337094 | 0.525009  | -1.410350 |
| 9  | 6  | 0 | 2.667806  | 2.393462  | 0.075591  |
| 10 | 1  | 0 | 3.406385  | 1.602373  | -0.002899 |
| 11 | 6  | 0 | 0.656299  | 4.248263  | 0.277050  |
| 12 | 1  | 0 | -0.165271 | 4.953717  | 0.352473  |
| 13 | 6  | 0 | -3.016270 | -0.690893 | -1.599687 |
| 14 | 1  | 0 | -2.907646 | -1.492723 | -0.876380 |
| 15 | 6  | 0 | -3.635876 | 0.723529  | 1.534347  |
| 16 | 1  | 0 | -4.102970 | 1.182237  | 0.666878  |
| 17 | 6  | 0 | -3.809085 | -0.874526 | -2.731196 |
| 18 | 1  | 0 | -4.327411 | -1.818195 | -2.874640 |
| 19 | 6  | 0 | -2.448804 | 1.539592  | -2.372101 |
| 20 | 1  | 0 | -1.908658 | 2.472725  | -2.243876 |
| 21 | 6  | 0 | 3.004238  | 3.733631  | 0.181926  |
| 22 | 1  | 0 | 4.047817  | 4.026914  | 0.184368  |
| 23 | 6  | 0 | 1.975400  | 4.674593  | 0.287643  |
| 24 | 1  | 0 | 2.199249  | 5.733840  | 0.376131  |
| 25 | 6  | 0 | -1.704807 | -0.289437 | 2.604542  |
| 26 | 1  | 0 | -0.671137 | -0.618361 | 2.558182  |
| 27 | 6  | 0 | -3.929922 | 0.144426  | -3.679733 |
| 28 | 1  | 0 | -4.548118 | -0.003897 | -4.560784 |
| 29 | 6  | 0 | -3.804255 | -0.117991 | 3.794952  |
| 30 | 1  | 0 | -4.395480 | -0.298366 | 4.688601  |
| 31 | 6  | 0 | -4.389098 | 0.499992  | 2.686331  |
| 32 | 1  | 0 | -5.433274 | 0.798861  | 2.715128  |
| 33 | 6  | 0 | -2.466257 | -0.514628 | 3.751971  |
| 34 | 1  | 0 | -2.014972 | -1.009731 | 4.606878  |
| 35 | 6  | 0 | -3.248599 | 1.349298  | -3.499962 |
| 36 | 1  | 0 | -3.333643 | 2.141048  | -4.239066 |
| 37 | 1  | 0 | -1.649098 | 3.074785  | 0.294831  |
| 38 | 53 | 0 | -0.092816 | -2.514662 | -0.095280 |

### SnCl<sub>4</sub>

Cartesian Coordinates (Angstroms):

|   |    |   |           |           |           |
|---|----|---|-----------|-----------|-----------|
| 1 | 50 | 0 | 0.000036  | 0.000015  | 0.000000  |
| 2 | 17 | 0 | 1.878696  | 1.328852  | 0.000000  |
| 3 | 17 | 0 | 0.000036  | -1.328664 | 1.878577  |
| 4 | 17 | 0 | 0.000036  | -1.328664 | -1.878577 |
| 5 | 17 | 0 | -1.878873 | 1.328432  | 0.000000  |

### Frequency Data:

Temperature 298.150 Kelvin. Pressure 1.00000 Atm.  
 Zero-point correction= 0.004720 (Hartree/Particle)  
 Thermal correction to Energy= 0.012428

Thermal correction to Enthalpy= 0.013372  
 Thermal correction to Gibbs Free Energy= -0.030752  
 Sum of electronic and zero-point Energies= -1843.648219  
 Sum of electronic and thermal Energies= -1843.640511  
 Sum of electronic and thermal Enthalpies= -1843.639567  
 Sum of electronic and thermal Free Energies= -1843.683691

### PhSnCl<sub>3</sub>

#### Cartesian Coordinates (Angstroms):

|    |    |   |           |           |           |
|----|----|---|-----------|-----------|-----------|
| 1  | 50 | 0 | -0.714801 | 0.000029  | -0.006692 |
| 2  | 17 | 0 | -1.696303 | -0.011224 | 2.132505  |
| 3  | 17 | 0 | -1.554789 | -1.908573 | -1.096856 |
| 4  | 17 | 0 | -1.551700 | 1.921444  | -1.076570 |
| 5  | 6  | 0 | 1.411744  | -0.000538 | -0.002728 |
| 6  | 6  | 0 | 2.104946  | -1.214361 | 0.012406  |
| 7  | 6  | 0 | 2.105243  | 1.213107  | 0.011737  |
| 8  | 6  | 0 | 3.498759  | -1.209183 | 0.037492  |
| 9  | 1  | 0 | 1.573752  | -2.163196 | -0.008531 |
| 10 | 6  | 0 | 3.499073  | 1.207592  | 0.036826  |
| 11 | 1  | 0 | 1.574191  | 2.162011  | -0.009726 |
| 12 | 6  | 0 | 4.193386  | -0.000872 | 0.052294  |
| 13 | 1  | 0 | 4.040031  | -2.151556 | 0.044811  |
| 14 | 1  | 0 | 4.040572  | 2.149838  | 0.043620  |
| 15 | 1  | 0 | 5.280068  | -0.001013 | 0.071907  |

#### Frequency Data:

Temperature 298.150 Kelvin. Pressure 1.00000 Atm.  
 Zero-point correction= 0.094542 (Hartree/Particle)  
 Thermal correction to Energy= 0.106151  
 Thermal correction to Enthalpy= 0.107095  
 Thermal correction to Gibbs Free Energy= 0.052289  
 Sum of electronic and zero-point Energies= -1614.870275  
 Sum of electronic and thermal Energies= -1614.858666  
 Sum of electronic and thermal Enthalpies= -1614.857722  
 Sum of electronic and thermal Free Energies= -1614.912528

### Me<sub>2</sub>SnCl<sub>2</sub>

#### Cartesian Coordinates (Angstroms):

|    |    |   |           |           |           |
|----|----|---|-----------|-----------|-----------|
| 1  | 50 | 0 | 0.000000  | 0.274904  | 0.000000  |
| 2  | 17 | 0 | 1.883342  | -1.132193 | 0.000000  |
| 3  | 17 | 0 | -1.883344 | -1.132191 | 0.000000  |
| 4  | 6  | 0 | 0.000001  | 1.316077  | -1.846997 |
| 5  | 1  | 0 | 0.000000  | 0.591654  | -2.665959 |
| 6  | 1  | 0 | -0.892787 | 1.943277  | -1.926238 |
| 7  | 1  | 0 | 0.892792  | 1.943274  | -1.926238 |
| 8  | 6  | 0 | 0.000001  | 1.316077  | 1.846997  |
| 9  | 1  | 0 | 0.892792  | 1.943275  | 1.926238  |
| 10 | 1  | 0 | -0.892788 | 1.943276  | 1.926239  |
| 11 | 1  | 0 | 0.000001  | 0.591654  | 2.665959  |

#### Frequency Data:

Temperature 298.150 Kelvin. Pressure 1.00000 Atm.

|                                              |                             |
|----------------------------------------------|-----------------------------|
| Zero-point correction=                       | 0.075575 (Hartree/Particle) |
| Thermal correction to Energy=                | 0.084881                    |
| Thermal correction to Enthalpy=              | 0.085825                    |
| Thermal correction to Gibbs Free Energy=     | 0.039083                    |
| Sum of electronic and zero-point Energies=   | -1003.179926                |
| Sum of electronic and thermal Energies=      | -1003.170619                |
| Sum of electronic and thermal Enthalpies=    | -1003.169675                |
| Sum of electronic and thermal Free Energies= | -1003.216417                |

## References:

---

<sup>1</sup> G. R. Fulmer, A. J. M. Miller, N. H. Sherden, H. E. Gottlieb, A. Nudelman, B. M. Stoltz, J. E. Bercaw and K. I. Goldberg, *Organometallics* 2010, **29**, 2176
